## **Birthweight, Type 2 Diabetes and Cardiovascular Disease: Addressing the Barker Hypothesis with Mendelian randomization**

**Running Title:** Birthweight, Type 2 Diabetes and Cardiovascular Disease

Daniela Zanetti<sup>1</sup>, Emmi Tikkanen<sup>1</sup>, Stefan Gustafsson<sup>2</sup>, James Rush Priest<sup>3</sup>,  
Stephen Burgess<sup>4</sup>, Erik Ingelsson<sup>1,2</sup>

1. Department of Medicine, Division of Cardiovascular Medicine, Stanford University School of Medicine, Stanford, CA;
2. Department of Medical Sciences, Molecular Epidemiology and Science for Life Laboratory, Uppsala University, Sweden;
3. Department of Medicine, Division of Pediatric Cardiology, Stanford University School of Medicine, Stanford, CA;
4. Department of Public Health and Primary Care, University of Cambridge, Cambridge, UK.

### **Address for Correspondence:**

Erik Ingelsson, MD, PhD, FAHA

300 Pasteur Dr, mail code: 5773; Stanford, CA 94305; USA

Phone: +1-650-656-0089; E-mail: [eriking@stanford.edu](mailto:eriking@stanford.edu)

**Word count:** 9,315 (main text); 318 (abstract)

## Abstract

**Background:** Low birthweight (BW) has been associated with a higher risk of hypertension, type 2 diabetes (T2D) and cardiovascular disease (CVD) in epidemiological studies. The Barker hypothesis posits that intrauterine growth restriction resulting in lower BW is causal for these diseases, but causality and mechanisms are difficult to infer from observational studies. Mendelian randomization (MR) is a new tool to address this important question.

**Methods:** We performed regression analyses to assess associations of self-reported BW with CVD and T2D in 237,631 individuals from the UK Biobank, a large population-based cohort study aged 40-69 years recruited across UK in 2006-2010. Further, we assessed the causal relationship of such associations using the two-sample MR approach, estimating the causal effect by contrasting the SNP effects on the exposure with the SNP effects on the outcome using independent publicly available genome-wide association datasets.

**Results:** In the observational analyses, BW showed strong inverse associations with systolic and diastolic blood pressure ( $\beta$ , -0.83 and -0.26; per raw unit in outcomes and SD change in BW; 95% CI, -0.90, -0.75 and -0.31, -0.22, respectively), T2D (odds ratio [OR], 0.83; 95% CI, 0.79, 0.87), lipid-lowering treatment (OR, 0.84; 95% CI, 0.81, 0.86) and CAD (hazard ratio [HR] 0.85; 95% CI, 0.78, 0.94); while the associations with adult body mass index (BMI) and body fat ( $\beta$ , 0.04 and 0.02; per SD change in outcomes and BW; 95% CI, 0.03, 0.04 and 0.01, 0.02, respectively) were positive. The MR analyses indicated inverse causal associations of BW with low density lipoprotein cholesterol, 2-hour glucose, CAD and T2D, and positive causal association with BMI; but no

associations with blood pressure. Sensitivity analyses and robust MR methods provided consistent results and indicated no horizontal pleiotropy.

**Conclusion:** Our study indicates that lower BW is causally and directly related with increased susceptibility to CAD and T2D in adulthood. This causal relationship is not mediated by adult obesity or hypertension.

**Key words:** Birthweight, obesity, type 2 diabetes, cardiovascular disease, genetics, Mendelian randomization

## Introduction

The association between low birthweight (BW) and increased risk of coronary artery disease (CAD) in adult life was first demonstrated by the British epidemiologist David Barker in a landmark paper in *the Lancet* in 1989<sup>1</sup>. This observation was later extended using a longitudinal cohort study of 8,760 participants with growth trajectories during childhood<sup>2</sup>. In this study, individuals with a low BW increased their weight rapidly after two years of age, and had increased risk of insulin resistance and CAD in adult life. In 1992, Barker proposed that these relationships could be explained by what he called the “*Thrifty phenotype hypothesis*”<sup>3</sup> attributing the association between poor fetal and infant growth and subsequent increased cardiovascular risk to arise from a compensatory response to nutritional deprivation in early life, resulting in permanent changes in glucose-insulin metabolism and somatic growth lasting into adulthood. Decreased insulin secretion and increased insulin resistance in combination with effects of obesity, ageing and physical inactivity are the most important factors leading to type 2 diabetes (T2D)<sup>3</sup>, but they are also independent risk factors for CAD, stroke, and hypertension<sup>4</sup>.

Still, it is not yet clear whether BW plays a causal role in the development of these outcomes as posited in the “Barker Hypothesis”; or if other phenomena, such as confounding factors (maternal smoking, socioeconomic level, ethnicity) have resulted in spurious associations in previous observational studies. We wanted to investigate causal mechanisms using the Mendelian randomization (MR) approach. This method has the ability to infer a causal relationship between a risk factor and a disease, using genetic markers as a proxy for a modifiable exposure. Two smaller prior MR studies indicated a causal association between low BW and T2D<sup>5</sup>, but not with lipids or CAD<sup>6</sup>. However, these studies were hampered by weak instrumental

variables including only five and seven single nucleotide polymorphisms (SNPs), respectively; resulting in limited statistical power. Furthermore, these studies did not address the relationship of BW with other important cardiovascular diseases and risk factors, including atrial fibrillation (AF), ischemic stroke (IS), blood pressure, body mass index (BMI), waist-to-hip ratio (WHR), high density lipoproteins (HDL), low density lipoprotein (LDL), triglycerides (TG), 2-hour glucose, fasting glucose, and fasting insulin.

The aims of the present study were to: 1) describe the relationships of self-reported BW to several cardiovascular traits in 237,631 participants of the UK Biobank (UKB); and 2) delineate any causal relationships between BW and CAD, AF, IS and T2D, and risk factors for these diseases (systolic and diastolic blood pressure [SBP and DBP], BMI, WHR, HDL, LDL, TG, 2-hour glucose, fasting glucose, and fasting insulin) by two-sample MR analysis using summary statistics from the largest available genome-wide association study (GWAS) meta-analyses.

## Methods

### Study sample

The UKB is a longitudinal cohort study of over 500,000 individuals aged 40-69 years initiated in the United Kingdom (UK) in 2006-2010<sup>7</sup>. We included 237,631 participants that knew their BW, to focus on the linear effects of birth weight we limited analysis to individuals reporting birth weights to be within 2.5 kg and 4.5 kg, and excluded individuals with CV prior enrollment (Supplemental Table I Online Data Supplement for details). We used UKB for our observational analyses, as well as to perform a GWAS of SBP and DBP (as publically available summary statistics were adjusted for BMI) to create an instrumental variable (IV) for the MR analyses. Cardiovascular outcomes for observational studies were defined using the International Classification of Diseases (ICD) codes (details in the Online Data Supplement). The exposure of interest was self-reported BW.

We used publicly available GWAS summary statistic of BW<sup>8</sup> as exposure; and of CAD<sup>9</sup>, AF<sup>10</sup>, IS<sup>11</sup>, SBP and DBP adjusted for BMI<sup>12</sup>, BMI<sup>13</sup>, WHR<sup>14</sup>, HDL, LDL, TG<sup>15</sup>, T2D<sup>16</sup>, 2-hour glucose<sup>17</sup>, fasting glucose, and fasting insulin<sup>18</sup> as outcomes. Details on the GWAS consortia, number of samples, proportion of variance explained and statistical power for MR analysis are presented in Table 1.

### Statistical methods

#### *Observational analysis*

After confirming normal distribution of all continuous variables, we performed multivariable linear regression models to assess associations of BW with SBP, DBP, BMI, body fat, and WHR; and multivariable logistic regression models to study associations of BW with T2D and lipid medications. Multivariable-adjusted Cox proportional hazards models were performed to assess associations of BW

with CAD, AF, IS, hemorrhagic stroke and heart failure events, separately; during a median follow-up time of 6.1 years (maximum 6.7 years). We use the DAGitty web tool (<http://dagitty.net/dags.html>) to systematically construct our multivariable model adjusting for confounders (Supplemental Figure I). All association analyses were adjusted for age, sex, region of the UKB assessment center, ethnicity, maternal smoking and Townsend index. We assessed evidence of nonlinear effects of BW on different outcomes using spline regression models. All observational analyses were performed in the UKB.

### *Mendelian randomization*

We performed two-sample Mendelian randomization analyses using publically available consortia data, except for blood pressure where we performed a GWAS in UKB. We assessed the causal relationships of BW with CAD, AF, IS and T2D, and risk factors for these diseases (SBP, DBP, BMI, WHR, HDL, LDL, TG, 2-hour glucose, fasting glucose and fasting insulin) using the two-sample MR approach<sup>19,20</sup>. In order to minimize the risk of pleiotropy affecting our results, we performed analyses using three different IVs:

- IV1) Including up to 58 independent lead variants (excluding the IGF2 locus due to imprinting; see Online Data Supplement) from the GWAS of BW performed by the EGG consortium<sup>8</sup>;
- IV2) Including up to 46 variants after exclusion of 12 variants associated with CAD, AF, IS and T2D at GWAS significance; any confounders at GWAS significance; or with any of the confounders or CAD, AF, IS and T2D at a P-value lower than the P-value for association with BW (Supplemental Figure II). These associations were estimated in UKB.

IV3) Excluded 1-9 heterogenous variants (different for each outcome; Supplemental Figure III). We performed a stepwise downward “model selection” in which SNPs were iteratively removed from the risk score until the heterogeneity test was no longer significant at the pre-specified threshold ( $P < 0.05$ ) using the R package *gtx*.

We decided *a priori* that IV2 would constitute our main model (balancing high statistical power and low risk of pleiotropy), but included IV1 to maximize power and IV3 to decrease risk of pleiotropy in sensitivity analyses.

We used four separate methods to estimate causal effects: the standard inverse-variance weighted (IVW) regression, the robust penalized IVW; as well as two robust regression methods, the weighted median-based method, and Egger regression<sup>20</sup>. We performed leave-one-out sensitivity analyses to identify if a single SNP was driving an association. To further address whether BW had a causal effect on CAD and T2D independently of BMI, we used a multivariate MR weighted regression-based method, in which the causal effects of multiple related risk factors can be estimated simultaneously<sup>21,22</sup>.

We estimated statistical power for the different MR analyses (Table 1) using sample sizes and variance explained specific for each analysis and an alpha threshold of 0.05 for two different effect sizes: 1) Assuming a fixed effect across phenotypes of 0.15 SD (continuous outcomes) or 20% (odds ratio, 1.2; dichotomous outcomes); and 2) For traits that were available in UKB, the effect size from observational analyses.



MR analyses were conducted with the R packages *TwoSampleMR*<sup>23</sup>, and *MendelianRandomization*<sup>24</sup>. Power for MR analyses was estimated with an online tool by Burgess (<https://sb452.shinyapps.io/power/>). Observational analyses were conducted with the R package *Survival* (version 3.3.0).

A flow chart of the different data sources used in this study is shown in Supplemental Figure IV. A detailed description of material and methods can be found in the Online Data Supplement.

## Results

In UKB, the mean age at baseline was 55.0 years (SD, 8.1 years) and 61% of subjects were females. During follow-up, 5,542 incident CVD cases occurred in participants free from the disease at baseline (2,656 CAD; and 1,580 AF; 688 IS; 363 hemorrhagic stroke; and 255 heart failure events; Supplemental Table I and II).

### Observational analyses

The results from observational analyses are summarized in Figure 1 (full results in Supplemental Table II). We observed strong inverse associations between BW and blood pressure, CAD, T2D and lipid-lowering treatment. In contrast, we observed strong and positive associations between BW and BMI and body fat percentage. After adjusting for multiple testing (12 traits), the associations were non-significant for WHR, AF, IS, hemorrhagic stroke and heart failure. We excluded non-linear associations between BW and any outcomes tested ( $P > 0.05$ ) by spline-regression (Supplemental Figure V).

### Mendelian randomization

In our main analyses (IVW using the 46-SNP instrumental variable [IV2]), we found evidence of causal associations of BW with BMI, LDL, 2-hour glucose, CAD and T2D (Figure 1). The direction of the effect was negative for all the above outcomes (i.e. higher BW was associated with lower risk and vice versa), with the exception of BMI, where higher BW was associated with higher BMI. We did not find evidence of causal effect of BW on HDL, TG, fasting insulin, AF, and IS.

The leave-one out sensitivity analysis did not highlight any heterogeneous SNPs with a large effect on the results. After excluding heterogeneous SNPs in the IV3,

our analysis showed no significant heterogeneity and no significant directional horizontal pleiotropy (all  $P > 0.05$ ; Supplemental Figure VI).

The analyses using penalized robust IVW, MR Egger, and weighted median methods consistently yielded similar effect estimates, but as expected with wider confidence intervals, especially for Egger regression (Supplemental Table III and Supplemental Figure VII). Further, sensitivity analyses using alternative IVs with higher power (IV1) and lower risk of pleiotropy (IV3) also provided similar results (Supplemental Table III).

The mediation analysis using the multivariate MR weighted regression-based method showed an independent association between BW and CAD, as well as between BW and T2D, not mediated by BMI in either case. The direction of the effect detected was consistent with our main MR analyses (Supplemental Table IV).

We had good statistical power to detect causal associations for all traits when assuming a fixed effect across phenotypes of 0.15 SD (continuous outcomes) or 20% (odds ratio, 1.2; dichotomous outcomes). When using the effect sizes from observational analyses of traits that were available in UKB, the power was adequate for all traits except DBP and WHR.

## Discussion

### Principal Findings

In this study of 237,631 individuals from the general population, we used self-reported BW as a proxy for fetal development to analyze downstream consequences of intrauterine growth restriction. We describe the association of BW with incidence of T2D and five cardiovascular outcomes (CAD, AF, IS, hemorrhagic stroke and heart failure), and cardiometabolic risk factors (blood pressure, BMI, body fat, and WHR), and we identify a causal role of BW in the development of several cardiometabolic diseases. Our principal findings are several. First, in our observational study, we established that self-reported BW displays strong inverse associations with blood pressure, CAD and T2D, and strong direct associations with BMI and body fat. Second, our MR analyses indicate that low BW is causally related to higher risk of LDL and 2-hour glucose; and higher CAD and T2D in adults. This highlights the influence of prenatal determinants of fetal growth on the development of cardiometabolic diseases in adulthood. Third, our study suggests high BW to be causally associated with increased BMI, but not causally associated with blood pressure. Taken together and considering the different direction of the causality for BMI and CAD/T2D (higher BW increases BMI; lower BW increases CAD and T2D), our results suggest a causal association of intrauterine growth restriction and low BW with risk for CAD and T2D, an association which does not appear to be mediated by obesity or hypertension.

In their initial description of the “*thrifty phenotype hypothesis*”<sup>3</sup>, Barker and Hales proposed that BMI would be a possible mediator of the associations detected between low BW and adult T2D and CAD. The hypothesized primary effect of BMI was supported by evidence from both population and experimental studies

linking low BW with predisposition to an increased risk of metabolic diseases such as T2D<sup>25,26,27,28,29</sup>, hypertension<sup>30,31</sup> and CAD<sup>32</sup>. However, in our study and in prior observational analyses, *higher* BW is associated with obesity (a universally recognized correlate of cardiometabolic disease) in both childhood<sup>33,34</sup> and adulthood<sup>35,8</sup>. Our findings suggest a causal association of low BW with CAD and T2D, which is uniquely independent of the relationship between high BW and increased BMI. Consistent with our observed effects of low BW on risk for CAD and T2D independent of adult obesity, a recent study of African American women failed to detect a causal role for BMI in mediating the increased risk for T2D in adult life among individuals with low BW<sup>36</sup>. New models for how risk for cardiometabolic disease in adulthood is directly conferred by growth restriction *in utero* without a compensatory change in BMI are needed to explain our observation of a direct causal relationship.

Explicit in the Barker hypothesis and explored by the experimental literature<sup>37,38</sup>, is a model in which prenatal growth stress leads to metabolic reprogramming beginning *in utero*. In the setting of prenatal malnutrition, the fetus is hypothesized to shift toward insulin resistance in order to allow for maximum uptake of available energy and nutrients. In this hypothesis, the persistence of insulin resistance after parturition might then trigger rapid postnatal growth with the concomitant potential for increased long-term risk of T2D, obesity and CAD in adulthood<sup>25,39</sup>. However, our findings support a separate direct causal link between intrauterine growth restriction and long-term risk for cardiometabolic disease, which does not involve adult obesity. Consistent with our detection of a causal relationship, one prior report using IV analyses, but with much fewer variants also described a direct causal association between low BW and T2D<sup>5</sup>.

In contrast to our results, Yeung et al.<sup>6</sup>, reported no causal association between BW and CAD. However, this study was based on a weak instrumental variable consisting of seven SNPs, explaining only 0.45% of the variance for BW (in contrast with our score that explained 2.2% of the variance), resulting in limited statistical power of 56% suggested by *post-hoc* calculations. In this context, it is also worth mentioning the genetic correlation analyses of BW with several health-related traits, published in the recent GWAS for BW used to create IVs for our MR study<sup>8</sup>. As in our study, they reported strong positive genetic correlations with BMI, and inverse genetic correlations with CAD and T2D. In contrast to our MR results, they highlight a negative genetic correlation with SBP. This discrepancy is probably related to the different methods used. Indeed, they used the linkage-disequilibrium score regression model<sup>40</sup> which use all GWAS summary statistics of the traits of interest to estimate the genetic correlations, while MR methods are based on a much smaller number of variants, aiming to decrease the risk of horizontal pleiotropy driving associations.

### Clinical Implications

Given our observation that low BW is causally related to LDL, 2-hour glucose, CAD and T2D, these findings are strongly consistent with the growing recognition of the long-term public health importance of supporting adequate prenatal nutrition. Diet is a broadly modifiable risk factor, and both maternal and paternal nutrition have an impact on the risk of metabolic syndrome, lipid dysregulation, fat deposition, obesity and hypertension in offspring via a hypothesized mechanism of *in utero* epigenetic imprinting<sup>41,42,43</sup>. Both epidemiological and animal studies highlight that undernutrition, overnutrition, and inadequate diet composition negatively impact fetoplacental growth and metabolic patterns, potentially having adverse later life metabolic effects for the offspring<sup>44</sup>. Additionally, our data may

also offer a window into the role by which non-nutritional factors affecting fetal growth such as congenital heart disease and premature birth, may predispose affected individuals to long-term risk of cardiometabolic disease in adulthood<sup>45,46,47</sup>.

Our results indicate that some proportion of common chronic diseases of adulthood could potentially be reduced by achieving optimal fetal nutrition. Short-term follow-up of children born after randomized nutritional interventions in pregnancy describe beneficial effects on growth, vascular function, lipid levels, glucose tolerance and insulin sensitivity; though longer-term studies examining nutrition and growth in premature infants display a more complex set of relationships<sup>48,49</sup>. Considered in the context of populations, our data suggest that attention to prenatal nutrition and intrauterine growth may have long-term consequences regarding the risk of CAD, obesity and diabetes in adult life.

### Strengths and limitations

To our knowledge, this is the largest and most comprehensive study of associations of BW with outcome to date. Additionally, we used three different IVs to maximize power and to decrease risk of pleiotropy, and several methods for MR analyses all yielding consistent effects for the tested hypotheses. However, our study is limited by the study samples of middle-aged to elderly individuals of European descent from rich countries. Hence, generalizability of our findings to other populations where the diet, prenatal care, prevalence and predispositions of cardiometabolic disease are different is unknown. Further, although we excluded variants with higher likelihood of pleiotropy from our analysis and applied a range of sensitivity analyses and methods robust to pleiotropy, little is known about the mechanisms underlying loci included in the IV. Though our comprehensive

analytical framework did not indicate any presence of horizontal pleiotropy, it is possible that some or all of these loci may also have a direct influence on the processes leading to CAD or T2D independent of intrauterine growth. Finally, despite the large sample in this study, statistical power to detect potentially causal relationships was limited for some traits, at least for the effect sizes from our observational analyses (in particular, DBP and WHR; Table 1).

### Conclusion

In conclusion, we demonstrate that intrauterine growth restriction, as evidenced by lower BW, is causally related with increased susceptibility to T2D and CAD, but that this effect is independent of adult hypertension or obesity, which has been previously hypothesized to be mediator of such association. Our study supports the notion that population level interventions improving prenatal nutrition and growth may improve cardiometabolic disease profiles later in life, but this needs to be confirmed using other study designs, such as large-scale community-based intervention trials.

### **Acknowledgements**

This research has been conducted using the UK Biobank Resource under Application Number 13721. Data on BW; CAD; AF; IS; SBP and DBP; BMI and WHR; HDL, LDL, and TG; T2D; 2-hour glucose, fasting glucose and fasting insulin have been contributed by EGG; CARDIoGRAMplusC4D; AFGen; ISGC; ICBP; GIANT; GLGC; DIAGRAM and MAGIC investigators, respectively.



## **Sources of Funding**

This research was performed with support from National Institutes of Health (1R01HL135313-01). ET was supported by the Finnish Cultural Foundation, Finnish Foundation for Cardiovascular Research and Emil Aaltonen Foundation.

## References

1. Barker DJP, Osmond C, Winter PD, Margetts B, Simmonds SJ. Weight in infancy and death from ischaemic heart disease. *Lancet*. 1989;334:577–580.
2. Barker DJP, Osmond C, Forsén TJ, Kajantie E, Eriksson JG. Trajectories of Growth among Children Who Have Coronary Events as Adults. *N Engl J Med*. 2005;353:1802–1809.
3. Hales CN, Barker DJP. Type 2 (non-insulin-dependent) diabetes mellitus: the thrifty phenotype hypothesis. *Int J Epidemiol*. 2013;42:1215–1222.
4. Barker DJP. Maternal nutrition, fetal nutrition, and disease in later life. *Nutrition*. 1997;13:807–813.
5. Wang T, Huang T, Li Y, Zheng Y, Manson JAE, Hu FB, Qi L. Low birthweight and risk of type 2 diabetes: a Mendelian randomisation study. *Diabetologia*. 2016;59(9):1920–7.
6. Au Yeung SL, Lin SL, Li AM, Schooling CM. Birth weight and risk of ischemic heart disease: A Mendelian randomization study. *Sci Rep*. 2016;6:38420.
7. Sudlow C, Gallacher J, Allen N, Beral V, Burton P, Danesh J, Downey P, Elliott P, Green J, Landray M, Liu B, Matthews P, Ong G, Pell J, Silman A, Young A, Sprosen T, Peakman T, Collins R. UK Biobank: An Open Access Resource for Identifying the Causes of a Wide Range of Complex Diseases of Middle and Old Age. *PLoS Med*. 2015;12:1–10.
8. Horikoshi M, Beaumont RN, Day FR, Warrington NM, Kooijman MN, Fernandez-Tajes J, Feenstra B, van Zuydam NR, Gaulton KJ, Grarup N, Bradfield JP, Strachan DP, Li-Gao R, Ahluwalia TS, Kreiner E, Rueedi R, Lyytikäinen LP, Cousminer DL, Wu Y, Thiering E, Wang CA, Have CT, Hottenga JJ, Vilor-Tejedor N, Joshi PK, Boh ETH, Ntalla I, Pitkänen N, Mahajan A, van Leeuwen EM, Joro R, Lagou V, Nodzenski M, Diver LA,

Zondervan KT, Bustamante M, Marques-Vidal P, Mercader JM, Bennett AJ, Rahmioglu N, Nyholt DR, Ma RCW, Tam CHT, Tam WH; CHARGE Consortium Hematology Working Group, Ganesh SK, van Rooij FJ, Jones SE, Loh PR, Ruth KS, Tuke MA, Tyrrell J, Wood AR, Yaghoobkar H, Scholtens DM, Paternoster L, Prokopenko I, Kovacs P, Atalay M, Willems SM, Panoutsopoulou K, Wang X, Carstensen L, Geller F, Schraut KE, Murcia M, van Beijsterveldt CE, Willemsen G, Appel EVR, Fonvig CE, Trier C, Tiesler CM, Standl M, Kutalik Z, Bonas-Guarch S, Hougaard DM, Sánchez F, Torrents D, Waage J, Hollegaard MV, de Haan HG, Rosendaal FR, Medina-Gomez C, Ring SM, Hemani G, McMahon G, Robertson NR, Groves CJ, Langenberg C, Luan J, Scott RA, Zhao JH, Mentch FD, MacKenzie SM, Reynolds RM, Lowe WL Jr, Tönjes A, Stumvoll M, Lindi V, Lakka TA, van Duijn CM, Kiess W, Körner A, Sørensen TI, Niinikoski H, Pahkala K, Raitakari OT, Zeggini E, Dedoussis GV, Teo YY, Saw SM, Melbye M, Campbell H, Wilson JF, Vrijheid M, de Geus EJ, Boomsma DI, Kadarmideen HN, Holm JC, Hansen T, Sebert S, Hattersley AT3, Beilin LJ, Newnham JP, Pennell CE, Heinrich J, Adair LS, Borja JB, Mohlke KL, Eriksson JG, Widén EE, Kähönen M, Viikari JS, Lehtimäki T, Vollenweider P, Bønnelykke K, Bisgaard H, Mook-Kanamori DO, Hofman A, Rivadeneira F, Uitterlinden AG, Pisinger C, Pedersen O, Power C, Hyppönen E, Wareham NJ, Hakonarson H, Davies E, Walker BR, Jaddoe VW, Jarvelin MR, Grant SF, Vaag AA, Lawlor DA, Frayling TM, Davey Smith G, Morris AP, Ong KK, Felix JF, Timpson NJ, Perry JR, Evans DM, McCarthy MI, Freathy RM. Genome-wide association for birth weight and correlation with adult disease. *Nature*. 2016;13;538(7624):248-252.

9. Nikpay M, Goel A, Won HH, Hall LM, Willenborg C, Kanoni S, Saleheen D, Kyriakou, Nelson CP, Hopewell JC, Webb TR, Zeng L, Dehghan A,

Alver M, Armasu SM, Auro K, Bjornes A, Chasman DI, Chen S, Ford I, Franceschini N, Gieger C, Grace C, Gustafsson S, Huang J, Hwang SJ, Kim YK, Kleber ME, Lau KW, Lu X, Lu Y, Lytikäinen LP, Mihailov E, Morrison AC, Pervjakova N, Qu L, Rose LM, Salfati E, Saxena R, Scholz M, Smith AV, Tikkanen E, Uitterlinden A, Yang X, Zhang W, Zhao W, de Andrade M, de Vries PS, van Zuydam NR, Anand SS, Bertram L, Beutner F, Dedoussis G, Frossard P, Gauguier D, Goodall AH, Gottesman O, Haber M, Han BG, Huang J, Jalilzadeh S, Kessler T, König IR, Lannfelt L, Lieb W, Lind L, Lindgren CM, Lokki ML, Magnusson PK, Mallick NH, Mehra N, Meitinger T, Memon FU, Morris AP, Nieminen MS, Pedersen NL, Peters A, Rallidis LS, Rasheed A, Samuel M, Shah SH, Sinisalo J, Stirrups KE, Trompet S, Wang L, Zaman KS, Ardissino D, Boerwinkle E, Borecki IB, Bottinger EP, Buring JE, Chambers JC, Collins R, Cupples LA, Danesh J, Demuth I, Elosua R, Epstein SE, Esko T, Feitosa MF, Franco OH, Franzosi MG, Granger CB, Gu D, Gudnason V, Hall AS, Hamsten A, Harris TB, Hazen SL, Hengstenberg C, Hofman A, Ingelsson E, Iribarren C, Jukema JW, Karhunen PJ, Kim BJ, Kooner JS, Kullo IJ, Lehtimäki T, Loos RJJ, Melander O, Metspalu A, März W, Palmer CN, Perola M, Quertermous T, Rader DJ, Ridker PM, Ripatti S, Roberts R, Salomaa V, Sanghera DK, Schwartz SM, Seedorf U, Stewart AF, Stott DJ, Thiery J, Zalloua PA, O'Donnell CJ, Reilly MP, Assimes TL, Thompson JR, Erdmann J, Clarke R, Watkins H, Kathiresan S, McPherson R, Deloukas P, Schunkert H, Samani NJ, Farrall M. A comprehensive 1000 Genomes-based genome-wide association meta-analysis of coronary artery disease. *Nat. Genet.* 2015;47(10):1121-1130.

10. Christophersen IE, Rienstra M, Roselli C, Yin X, Geelhoed B, Barnard J, Lin H, Arking DE, Smith AV, Albert CM, Chaffin M, Tucker NR, Li M, Klarin

D, Bihlmeyer NA, Low S-K, Weeke PE, Müller-Nurasyid M, Smith JG, Brody JA, Niemeijer MN, Dörr M, Trompet S, Huffman J, Gustafsson S, Schurmann C, Kleber ME, Lytykäinen L-P, Seppälä I, Malik R, Horimoto ARVR, Perez M, Sinisalo J, Aeschbacher S, Thériault S, Yao J, Radmanesh F, Weiss S, Teumer A, Choi SH, Weng L-C, Clauss S, Deo R, Rader DJ, Shah SH, Sun A, Hopewell JC, Debette S, Chauhan G, Yang Q, Worrall BB, Paré G, Kamatani Y, Hagemeijer YP, Verweij N, Siland JE, Kubo M, Smith JD, Van Wagoner DR, Bis JC, Perz S, Psaty BM, Ridker PM, Magnani JW, Harris TB, Launer LJ, Shoemaker MB, Padmanabhan S, Haessler J, Bartz TM, Waldenberger M, Lichtner P, Arendt M, Krieger JE, Kähönen M, Risch L, Mansur AJ, Peters A, Smith BH, Lind L, Scott SA, Lu Y, Bottinger EB, Hernesniemi J, Lindgren CM, Wong JA, Huang J, Eskola M, Morris AP, Ford I, Reiner AP, Delgado G, Chen LY, Chen Y-DI, Sandhu RK, Li M, Boerwinkle E, Eisele L, et al. Large-scale analyses of common and rare variants identify 12 new loci associated with atrial fibrillation. *Nat Genet.* 2017;49:946–952.

11. NINDS Stroke Genetics Network (SiGN) and International Stroke Genetics Consortium (ISGC), Pulit SL, McArdle PF, Wong Q, Malik R, Gwinn K, Achterberg S, Algra A, Amouyel P, Anderson CD, Donna K, Arnett DK, Arsava EM, Attia J, Ay H, Bartz TM, Battey T, Benavente OR, Bevan S, Biffi A, Bis JC, Blanton SH, Boncoraglio GB, Brown RD, Burgess AI, Carrera C, Smith SNC, Chasman DI, Chauhan G, Chen WM, Cheng YC, Chong M, Cloonan LK, Cole JW, Cotlarciuc I, Cruchaga C, Cuadrado-Godia E, Dave T, Dawson J, Debette S, Delavaran H, Dell CA, Dichgans M, Doheny KF, Dong C, Duggan DJ, Engström G, Evans MK, Pallejà XE, Faul JD, Fernández-Cadenas I, Fornage M, Frossard PM, Furie K, Gamble DM, Gieger C, Giese AK, Giralt-Steinhauer E, González HM, Goris A,

Gretarsdottir S, Grewal RP, Grittner U, Gustafsson S, Han B, Hankey GJ, Heitsch L, Higgins P, Hochberg MC, Holliday E, Hopewell JC, Horenstein RB, Howard G, Ikram MA, Ilinca A, Ingelsson E, Irvin MR, Jackson RD, Jern C, Conde JJ, Johnson JA, Jood K, Kahn MS, Kaplan R, Kappelle LJ, Kardina SLR, Keene KL, Kissela BM, Kleindorfer DO, Koblar S, Labovitz D, Launer LJ, Laurie CC, Laurie CA, Lee CH, Lee JM, Lehm M, Lemmens R, Levi C, Leys D, Lindgren A, Longstreth WT, Maguire JJ, Manichaikul A, Markus HS, McClure LS, McDonough CW, Meisinger C, Melander O, Meschia JF, Mola-Caminal M, Montaner J, Mosley TH, Müller-Nurasyid M, Nalls MA, O'Connell JR, O'Donnell M, Ois A, Papanicolaou GJ, Paré G, Peddareddygari LR, Pedersén A, Pera J, Peters A, Poole D, Psaty BM, Rabionet R, Raffeld MR, Rannikmäe K, Rasheed A, Redfors P, Reiner AP, Rexrode K, Ribasés M, Rich SS, Robberecht W, Rodriguez-Campello A, Rolfs A, Roquer J, Rose LM, Rosenbaum D, Rost NS, Rothwell PM, Rundek T, Ryan KS, Sacco RL, Sale MM, Saleheen D, Salomaa V, Sánchez-Mora C, Schmidt OC, Schmidt H, Schmidt R, Schürks M, Scott R, Segal HC, Seiler S, Seshadri S, Sharma P, Shuldiner AR, Silver B, Slowik A, Smith JA, Söderholm M, Soriano C, Sparks MJ, Stanne T, Stefansson K, Stine OC, Strauch K, Sturm J, Sudlow CLM, Tajuddin SM, Talbert RL, Tatlisumak T, Thijs V, Thorleifsson G, Thorsteindottir U, Tiedt S, Traylor M, Trompet S, Valant V, Waldenberger M, Walters M, Wang L, Wassertheil-Smoller S, Weir DR, Wiggins KL, Williams SR, Wloch-Kopec D, Woo D, Woodfield R, Wu O, Xu H, Zonderman AB, Australian Stroke Genetics Consortium, Cervical Artery Dissection and Ischemic Stroke Patients (CADISP) study, Cohorts of Heart and Aging Research in Genomic Epidemiology (CHARGE) consortium, Consortium of Minority Population genome-wide Association Studies of Stroke (COMPASS), METASTROKE consortium, Wellcome

- Trust Case-Control Consortium, Worrall BB, Bakker PIW, Kittner SJ, Mitchell BD, and Rosand J. The NINDS Stroke Genetics Network: a genome-wide association study of ischemic stroke and its subtypes. *Lancet Neurol*. 2016; 15(2): 174–184.
12. Ehret GB, Ferreira T, Chasman DI, Jackson AU, Schmidt EM, Johnson T, Thorleifsson G, Luan J, Donnelly LA, Kanoni S, Petersen AK, Pihur V, Strawbridge RJ, Shungin D, Hughes MF, Meirelles O, Kaakinen M, Bouatia-Naji N, Kristiansson K, Shah S, Kleber ME, Guo X, Lytykäinen LP, Fava C, Eriksson N, Nolte IM, Magnusson PK, Salfati EL, Rallidis LS, Theusch E, Smith AJP, Folkersen L, Witkowska K, Pers TH, Joehanes R, Kim SK, Lataniotis L, Jansen R, Johnson AD, Warren H, Kim YJ, Zhao W, Wu Y, Tayo BO, Bochud M; CHARGE-EchoGen consortium; CHARGE-HF consortium; Wellcome Trust Case Control Consortium, Absher D, Adair LS, Amin N, Arking D, Axelsson T, Baldassarre D, Balkau B, Bandinelli S, Barnes MR, Barroso I, Bevan S, Bis JC, Bjornsdottir G, Boehnke M, Boerwinkle E, Bonnycastle LL, Boomsma DI, Bornstein SR, Brown MJ, Burnier M, Cabrera CP, Chambers JC, Chang IS, Cheng CY, Chines PS, Chung RH, Collins FS, Connell JM, Döring A, Dallongeville J, Danesh J, de Faire U, Delgado G, Dominiczak AF, Doney ASF, Drenos F, Edkins S, Eicher JD, Elosua R, Enroth S, Erdmann J, Eriksson P, Esko T, Evangelou E, Evans A, Fall T, Farrall M, Felix JF, Ferrières J, Ferrucci L, Fornage M, Forrester T, Franceschini N, Duran OHF, Franco-Cereceda A, Fraser RM, Ganesh SK, Gao H, Gertow K, Gianfagna F, Gigante B, Giulianini F, Goel A, Goodall AH, Goodarzi MO, Gorski M, Gräßler J, Groves C, Gudnason V, Gyllenstein U, Hallmans G, Hartikainen AL, Hassinen M, Havulinna AS, Hayward C, Hercberg S, Herzig KH, Hicks AA, Hingorani AD, Hirschhorn JN, Hofman A, Holmen J, Holmen OL, Hottenga JJ, Howard P, Hsiung CA,

Hunt SC, Ikram MA, Illig T, Iribarren C, Jensen RA, Kähönen M, Kang H, Kathiresan S, Keating BJ, Khaw KT, Kim YK, Kim E, Kivimäki M, Klopp N, Kolovou G, Komulainen P, Kooner JS, Kosova G, Krauss RM, Kuh D, Kutalik Z, Kuusisto J, Kvaløy K, Lakka TA, Lee NR, Lee IT, Lee WJ, Levy D, Li X, Liang KW, Lin H, Lin L, Lindström J, Lobbens S, Männistö S, Müller G, Müller-Nurasyid M, Mach F, Markus HS, Marouli E, McCarthy MI, McKenzie CA, Meneton P, Menni C, Metspalu A, Mijatovic V, Moilanen L, Montasser ME, Morris AD, Morrison AC, Mulas A, Nagaraja R, Narisu N, Nikus K, O'Donnell CJ, O'Reilly PF, Ong KK, Paccaud F, Palmer CD, Parsa A, Pedersen NL, Penninx BW, Perola M, Peters, Poulter N, Pramstaller PP, Psaty BM, Quertermous T, Rao DC, Rasheed A, Rayner NWNWR, Renström F, Rettig R, Rice KM, Roberts R, Rose LM, Rossouw J, Samani NJ, Sanna S, Saramies J, Schunkert H, Sebert S, Sheu WH, Shin YA, Sim X, Smit JH, Smith AV, Sosa MX, Spector TD, Stančáková A, Stanton A, Stirrups KE, Stringham HM, Sundstrom J, Swift AJ, Syvänen AC, Tai ES, Tanaka T, Tarasov KV, Teumer A, Thorsteinsdóttir U, Tobin MD, Tremoli E, Uitterlinden AG, Uusitupa M, Vaez A, Vaidya D, van Duijn CM, van Iperen EPA, Vasán RS, Verwoert GC, Virtamo J, Vitart V, Voight BF, Vollenweider P, Wagner A, Wain LV, Wareham NJ, Watkins H, Weder AB, Westra HJ, Wilks R, Wilsgaard T, Wilson JF, Wong TY, Yang TP, Yao J, Yengo L, Zhang W, Zhao JH, Zhu X, Bovet P, Cooper RS, Mohlke KL, Saleheen D, Lee JY, Elliott P, Gierman HJ, Willer CJ, Franke L, Hovingh GK, Taylor KD, Dedoussis G, Sever P, Wong A, Lind L, Assimes TL, Njølstad I, Schwarz PE, Langenberg C, Snieder H, Caulfield MJ, Melander O, Laakso M, Saltevo J, Rauramaa R, Tuomilehto J, Ingelsson E, Lehtimäki T, Hveem K, Palmas W, März W, Kumari M, Salomaa V, Chen YI, Rotter J, Froguel P, Jarvelin MR, Lakatta E, Kuulasmaa K, Franks PW, Hamsten A,



- Wichmann HE, Palmer CNA, Stefansson K, Ridker PM, Loos RJF, Chakravarti A, Deloukas P, Morris AP, Newton-Cheh C, Munroe PB. The genetics of blood pressure regulation and its target organs from association studies in 342,415 individuals. *Nat Genet.* 2016 Oct;48(10):1171-1184.
13. Berndt SI, Gustafsson S, Mägi R, Ganna A, Wheeler E, Feitosa MF, Justice AE, Monda KL, Croteau-Chonka DC, Day FR, Esko T, Fall T, Ferreira T, Gentilini D, Jackson AU, Luan J, Randall JC, Vedantam S, Willer CJ, Winkler TW, Wood AR, Workalemahu T, Hu YJ, Lee SH, Liang L, Lin DY, Min JL, Neale BM, Thorleifsson G, Yang J, Albrecht E, Amin N, Bragg-Gresham JL, Cadby G, den Heijer M, Eklund N, Fischer K, Goel A, Hottenga JJ, Huffman JE, Jarick I, Johansson Å, Johnson T, Kanoni S, Kleber ME, König IR, Kristiansson K, Kutalik Z, Lamina C, Lecoeur C, Li G, Mangino M, McArdle WL, Medina-Gomez C, Müller-Nurasyid M, Ngwa JS, Nolte IM, Paternoster L, Pechlivanis S, Perola M, Peters MJ, Preuss M, Rose LM, Shi J, Shungin D, Smith AV, Strawbridge RJ, Surakka I, Teumer A, Trip MD, Tyrer J, Van Vliet-Ostaptchouk JV, Vandenput L, Waite LL, Zhao JH, Absher D, Asselbergs FW, Atalay M, Attwood AP, Balmforth AJ, Basart H, Beilby J, Bonnycastle LL, Brambilla P, Bruinenberg M, Campbell H, Chasman DI, Chines PS, Collins FS, Connell JM, Cookson WO, de Faire U, de Vegt F, Dei M, Dimitriou M, Edkins S, Estrada K, Evans DM, Farrall M, Ferrario MM, Ferrières J, Franke L, Frau F, Gejman PV, Grallert H, Grönberg H, Gudnason V, Hall AS, Hall P, Hartikainen AL, Hayward C, Heard-Costa NL, Heath AC, Hebebrand J, Homuth G, Hu FB, Hunt SE, Hyppönen E, Iribarren C, Jacobs KB, Jansson JO, Jula A, Kähönen M, Kathiresan S, Kee F, Khaw KT, Kivimäki M, Koenig W, Kraja AT, Kumari M, Kuulasmaa K, Kuusisto J, Laitinen JH, Lakka TA, Langenberg C, Launer LJ, Lind L, Lindström J, Liu J, Liuzzi A, Lokki ML, Lorentzon M, Madden

PA, Magnusson PK, Manunta P, Marek D, März W, Mateo Leach I, McKnight B, Medland SE, Mihailov E, Milani L, Montgomery GW, Mooser V, Mühleisen TW, Munroe PB, Musk AW, Narisu N, Navis G, Nicholson G, Nohr EA, Ong KK, Oostra BA, Palmer CN, Palotie A, Peden JF, Pedersen N, Peters A, Polasek O, Pouta A, Pramstaller PP, Prokopenko I, Pütter C, Radhakrishnan A, Raitakari O, Rendon A, Rivadeneira F, Rudan I, Saaristo TE, Sambrook JG, Sanders AR, Sanna S, Saramies J, Schipf S, Schreiber S, Schunkert H, Shin SY, Signorini S, Sinisalo J, Skrobek B, Soranzo N, Stančáková A, Stark K, Stephens JC, Stirrups K, Stolk RP, Stumvoll M, Swift AJ, Theodoraki EV, Thorand B, Tregouet DA, Tremoli E, Van der Klauw MM, van Meurs JB, Vermeulen SH, Viikari J, Virtamo J, Vitart V, Waeber G, Wang Z, Widén E, Wild SH, Willemsen G, Winkelmann BR, Witteman JC, Wolffenbuttel BH, Wong A, Wright AF, Zillikens MC, Amouyel P, Boehm BO, Boerwinkle E, Boomsma DI, Caulfield MJ, Chanock SJ, Cupples LA, Cusi D, Dedoussis GV, Erdmann J, Eriksson JG, Franks PW, Froguel P, Gieger C, Gyllenstein U, Hamsten A, Harris TB, Hengstenberg C, Hicks AA, Hingorani A, Hinney A, Hofman A, Hovingh KG, Hveem K, Illig T, Jarvelin MR, Jöckel KH, Keinanen-Kiukaanniemi SM, Kiemeny LA, Kuh D, Laakso M, Lehtimäki T, Levinson DF, Martin NG, Metspalu A, Morris AD, Nieminen MS, Njølstad I, Ohlsson C, Oldehinkel AJ, Ouwehand WH, Palmer LJ, Penninx B, Power C, Province MA, Psaty BM, Qi L, Rauramaa R, Ridker PM, Ripatti S, Salomaa V, Samani NJ, Snieder H, Sørensen TI, Spector TD, Stefansson K, Tönjes A, Tuomilehto J, Uitterlinden AG, Uusitupa M, van der Harst P, Vollenweider P, Wallaschofski H, Wareham NJ, Watkins H, Wichmann HE, Wilson JF, Abecasis GR, Assimes TL, Barroso I, Boehnke M, Borecki IB, Deloukas P, Fox CS, Frayling T, Groop LC, Haritunian T, Heid IM, Hunter D, Kaplan

- RC, Karpe F, Moffatt MF, Mohlke KL, O'Connell JR, Pawitan Y, Schadt EE, Schlessinger D, Steinthorsdottir V, Strachan DP, Thorsteinsdottir U, van Duijn CM, Visscher PM, Di Blasio AM, Hirschhorn JN, Lindgren CM, Morris AP, Meyre D, Scherag A, McCarthy MI, Speliotes EK, North KE, Loos RJ, Ingelsson E. Genome-wide meta-analysis identifies 11 new loci for anthropometric traits and provides insights into genetic architecture. *Nat Genet.* 2013 May;45(5):501-12.
14. Shungin D, Winkler TW, Croteau-Chonka DC, Ferreira T, Locke AE, Mägi R, Strawbridge RJ, Pers TH, Fischer K, Justice AE, Workalemahu T, Wu JMW, Buchkovich ML, Heard-Costa NL, Roman TS, Drong AW, Song C, Gustafsson S, Day FR, Esko T, Fall T, Kutalik Z, Luan J, Randall JC, Scherag A, Vedantam S, Wood AR, Chen J, Fehrmann R, Karjalainen J, Kahali B, Liu C-T, Schmidt EM, Absher D, Amin N, Anderson D, Beekman M, Bragg-Gresham JL, Buyske S, Demirkan A, Ehret GB, Feitosa MF, Goel A, Jackson AU, Johnson T, Kleber ME, Kristiansson K, Mangino M, Mateo Leach I, Medina-Gomez C, Palmer CD, Pasko D, Pechlivanis S, Peters MJ, Prokopenko I, Stančáková A, Ju Sung Y, Tanaka T, Teumer A, Van Vliet-Ostaptchouk J V., Yengo L, Zhang W, Albrecht E, Ärnlöv J, Arscott GM, Bandinelli S, Barrett A, Bellis C, Bennett AJ, Berne C, Blüher M, Böhringer S, Bonnet F, Böttcher Y, Bruinenberg M, Carba DB, Caspersen IH, Clarke R, Warwick Daw E, Deelen J, Deelman E, Delgado G, Doney ASF, Eklund N, Erdos MR, Estrada K, Eury E, Friedrich N, Garcia ME, Giedraitis V, Gigante B, Go AS, Golay A, Grallert H, Grammer TB, Gräßler J, Grewal J, Groves CJ, et al. New genetic loci link adipose and insulin biology to body fat distribution. *Nature.* 2015;518:187–196.
15. Willer CJ, Schmidt EM, Sengupta S, Peloso GM, Gustafsson S, Kanoni S, Ganna A, Chen J, Buchkovich ML, Mora S, Beckmann JS, Bragg-Gresham

- JL, Chang H-Y, Demirkan A, Den Hertog HM, Do R, Donnelly LA, Ehret GB, Esko T, Feitosa MF, Ferreira T, Fischer K, Fontanillas P, Fraser RM, Freitag DF, Gurdasani D, Heikkilä K, Hyppönen E, Isaacs A, Jackson AU, Johansson Å, Johnson T, Kaakinen M, Kettunen J, Kleber ME, Li X, Luan J, Lyytikäinen L-P, Magnusson PKE, Mangino M, Mihailov E, Montasser ME, Müller-Nurasyid M, Nolte IM, O'Connell JR, Palmer CD, Perola M, Petersen A-K, Sanna S, Saxena R, Service SK, Shah S, Shungin D, Sidore C, Song C, Strawbridge RJ, Surakka I, Tanaka T, Teslovich TM, Thorleifsson G, Van den Herik EG, Voight BF, Volcik KA, Waite LL, Wong A, Wu Y, Zhang W, Absher D, Asiki G, Barroso I, Been LF, Bolton JL, Bonnycastle LL, Brambilla P, Burnett MS, Cesana G, Dimitriou M, Doney ASF, Döring A, Elliott P, Epstein SE, Eyjolfsson GI, Gigante B, Goodarzi MO, Grallert H, Gravito ML, Groves CJ, Hallmans G, Hartikainen A-L, Hayward C, Hernandez D, Hicks AA, Holm H, Hung Y-J, Illig T, Jones MR, Kaleebu P, Kastelein JJP, et al. Discovery and refinement of loci associated with lipid levels. *Nat Genet.* 2013;45:1274–1283.
16. Morris AP, Voight BF, Teslovich TM, Ferreira T, Segrè A V, Steinthorsdottir V, Strawbridge RJ, Khan H, Grallert H, Mahajan A, Prokopenko I, Kang HM, Dina C, Esko T, Fraser RM, Kanoni S, Kumar A, Lagou V, Langenberg C, Luan J, Lindgren CM, Müller-Nurasyid M, Pechlivanis S, Rayner NW, Scott LJ, Wiltshire S, Yengo L, Kinnunen L, Rossin EJ, Raychaudhuri S, Johnson AD, Dimas AS, Loos RJJ, Vedantam S, Chen H, Florez JC, Fox C, Liu C-T, Rybin D, Couper DJ, Kao WHL, Li M, Cornelis MC, Kraft P, Sun Q, van Dam RM, Stringham HM, Chines PS, Fischer K, Fontanillas P, Holmen OL, Hunt SE, Jackson AU, Kong A, Lawrence R, Meyer J, Perry JRB, Platou CGP, Potter S, Rehnberg E, Robertson N, Sivapalaratnam S, Stančáková A, Stirrups K, Thorleifsson G,

- Tikkanen E, Wood AR, Almgren P, Atalay M, Benediktsson R, Bonnycastle LL, Burt N, Carey J, Charpentier G, Crenshaw AT, Doney ASF, Dorkhan M, Edkins S, Emilsson V, Eury E, Forsen T, Gertow K, Gigante B, Grant GB, Groves CJ, Guiducci C, Herder C, Hreidarsson AB, Hui J, James A, Jonsson A, Rathmann W, Klopp N, Kravic J, Krjutškov K, Langford C, Leander K, Lindholm E, et al. Large-scale association analysis provides insights into the genetic architecture and pathophysiology of type 2 diabetes. *Nat Genet.* 2012;44:981–990.
17. Scott RA, Lagou V, Welch RP, Wheeler E, Montasser ME, Luan J, Mägi R, Strawbridge RJ, Rehnberg E, Gustafsson S, Kanoni S, Rasmussen-Torvik LJ, Yengo L, Lecoeur C, Shungin D, Sanna S, Sidore C, Johnson PCD, Jukema JW, Johnson T, Mahajan A, Verweij N, Thorleifsson G, Hottenga J-J, Shah S, Smith A V, Sennblad B, Gieger C, Salo P, Perola M, Timpson NJ, Evans DM, Pourcain BS, Wu Y, Andrews JS, Hui J, Bielak LF, Zhao W, Horikoshi M, Navarro P, Isaacs A, O’Connell JR, Stirrups K, Vitart V, Hayward C, Esko T, Mihailov E, Fraser RM, Fall T, Voight BF, Raychaudhuri S, Chen H, Lindgren CM, Morris AP, Rayner NW, Robertson N, Rybin D, Liu C-T, Beckmann JS, Willems SM, Chines PS, Jackson AU, Kang HM, Stringham HM, Song K, Tanaka T, Peden JF, Goel A, Hicks AA, An P, Müller-Nurasyid M, Franco-Cereceda A, Folkersen L, Marullo L, Jansen H, Oldehinkel AJ, Bruinenberg M, Pankow JS, North KE, Forouhi NG, Loos RJJ, Edkins S, Varga T V, Hallmans G, Oksa H, Antonella M, Nagaraja R, Trompet S, Ford I, Bakker SJL, Kong A, Kumari M, Gigante B, Herder C, Munroe PB, Caulfield M, Antti J, Mangino M, et al. Large-scale association analyses identify new loci influencing glycemic traits and provide insight into the underlying biological pathways. *Nat Genet.* 2012;44:991–1005.
18. Manning AK, Hivert M-F, Scott RA, Grimsby JL, Bouatia-Naji N, Chen H,

- Rybin D, Liu C-T, Bielak LF, Prokopenko I, Amin N, Barnes D, Cadby G, Hottenga J-J, Ingelsson E, Jackson AU, Johnson T, Kanoni S, Ladenvall C, Lagou V, Lahti J, Lecoeur C, Liu Y, Martinez-Larrad MT, Montasser ME, Navarro P, Perry JRB, Rasmussen-Torvik LJ, Salo P, Sattar N, Shungin D, Strawbridge RJ, Tanaka T, van Duijn CM, An P, de Andrade M, Andrews JS, Aspelund T, Atalay M, Aulchenko Y, Balkau B, Bandinelli S, Beckmann JS, Beilby JP, Bellis C, Bergman RN, Blangero J, Boban M, Boehnke M, Boerwinkle E, Bonnycastle LL, Boomsma DI, Borecki IB, Böttcher Y, Bouchard C, Brunner E, Budimir D, Campbell H, Carlson O, Chines PS, Clarke R, Collins FS, Corbatón-Anchuelo A, Couper D, de Faire U, Dedoussis G V, Deloukas P, Dimitriou M, Egan JM, Eiriksdottir G, Erdos MR, Eriksson JG, Eury E, Ferrucci L, Ford I, Forouhi NG, Fox CS, Franzosi MG, Franks PW, Frayling TM, Froguel P, Galan P, de Geus E, Gigante B, Glazer NL, Goel A, Groop L, Gudnason V, Hallmans G, Hamsten A, Hansson O, Harris TB, Hayward C, Heath S, Hercberg S, Hicks AA, Hingorani A, Hofman A, et al. A genome-wide approach accounting for body mass index identifies genetic variants influencing fasting glycaemic traits and insulin resistance. *Nat Genet.* 2012;44:659–669.
19. Burgess S, Scott RA, Timpson NJ, Smith GD, Thompson SG. Using published data in Mendelian randomization: A blueprint for efficient identification of causal risk factors. *Eur J Epidemiol.* 2015;30:543–552.
  20. Burgess S, Bowden J, Fall T, Ingelsson E, Thompson SG. Sensitivity Analyses for Robust Causal Inference from Mendelian Randomization Analyses with Multiple Genetic Variants. *Epidemiology.* 2017;28:30–42.
  21. Burgess S, Thompson SG. Multivariable Mendelian randomization: The use of pleiotropic genetic variants to estimate causal effects. *Am J Epidemiol.* 2015;181:251–260.

22. Do R, Willer CJ, Schmidt EM, Sengupta S, Gao C, Peloso GM, Gustafsson S, Kanoni S, Ganna A, Chen J, Buchkovich ML, Mora S, Beckmann JS, Bragg-Gresham JL, Chang H-Y, Demirkan A, Den Hertog HM, Donnelly LA, Ehret GB, Esko T, Feitosa MF, Ferreira T, Fischer K, Fontanillas P, Fraser RM, Freitag DF, Gurdasani D, Heikkilä K, Hyppönen E, Isaacs A, Jackson AU, Johansson Å, Johnson T, Kaakinen M, Kettunen J, Kleber ME, Li X, Luan J, Lyytikäinen L-P, Magnusson PKE, Mangino M, Mihailov E, Montasser ME, Müller-Nurasyid M, Nolte IM, O'Connell JR, Palmer CD, Perola M, Petersen A-K, Sanna S, Saxena R, Service SK, Shah S, Shungin D, Sidore C, Song C, Strawbridge RJ, Surakka I, Tanaka T, Teslovich TM, Thorleifsson G, Van den Herik EG, Voight BF, Volcik KA, Waite LL, Wong A, Wu Y, Zhang W, Absher D, Asiki G, Barroso I, Been LF, Bolton JL, Bonnycastle LL, Brambilla P, Burnett MS, Cesana G, Dimitriou M, Doney ASF, Döring A, Elliott P, Epstein SE, Eyjolfsson GI, Gigante B, Goodarzi MO, Grallert H, Gravito ML, Groves CJ, Hallmans G, Hartikainen A-L, Hayward C, Hernandez D, Hicks AA, Holm H, Hung Y-J, Illig T, Jones MR, Kaleebu P, et al. Common variants associated with plasma triglycerides and risk for coronary artery disease. *Nat Genet.* 2013;45:1345–1352.
23. Hemani G, Zheng J, Wade KH, Laurin C, Elsworth, Burgess S, Bowden J, Langdon R, Tan V, Yarmolinsky J, Shihab HA, Timpson N, Evans DM, Relton C, Martin RM, Smith GD, Gaunt TR, Haycock PC. MR-Base: a platform for systematic causal inference across the phenome using billions of genetic associations. *bioRxiv.* 2016.
24. Yavorska OO, Burgess S. MendelianRandomization: an R package for performing Mendelian randomization analyses using summarized data. *Int J Epidemiol.* 2017;1–6.
25. Hales CN, Barker DJ, Clark PM, Cox LJ, Fall C, Osmond C, Winter PD.

- Fetal and infant growth and impaired glucose tolerance at age 64. *BMJ*. 1991;303:1019–22.
26. Shi Z, Zhang C, Zhou M, Zhen S, Taylor AW. Exposure to the Chinese famine in early life and the risk of anaemia in adulthood. *BMC Public Health*. 2013;13:904.
  27. Lumey LH, Khalangot MD, Vaiserman AM. Association between type 2 diabetes and prenatal exposure to the Ukraine famine of 1932–33: a retrospective cohort study. *Lancet Diabetes Endocrinol*. 2015;3:787–794.
  28. Harder T, Rodekamp E, Schellong K, Dudenhausen JW, Plagemann A. Birth weight and subsequent risk of type 2 diabetes: A meta-analysis. *Am J Epidemiol*. 2007;165:849–857.
  29. PH W, SJ K, CG O, Huxley R, DG C, Anazawa S. Birth weight and risk of type 2 diabetes: a systematic review. *Jama*. 2008;300:2886–2897.
  30. Johansson S, Iliadou A, Bergvall N, Tuvemo T, Norman M, Cnattingius S. Risk of high blood pressure among young men increases with the degree of immaturity at birth. *Circulation*. 2005;112:3430–3436.
  31. Reynolds RM, Walker BR, Phillips DI, Dennison EM, Fraser R, Mackenzie SM, Davies E, Connell JM. Programming of hypertension associations of plasma aldosterone in adult men and women with birthweight, cortisol, and blood pressure. *Hypertension*. 2009;53:932–936.
  32. Lawlor DA, Ronalds G, Clark H, Smith GD, Leon DA. Birth weight is inversely associated with incident coronary heart disease and stroke among individuals born in the 1950s: Findings from the Aberdeen children of the 1950s prospective cohort study. *Circulation*. 2005;112:1414–1418.
  33. Binkin NJ, Yip R, Fleshood L, Trowbridge FL. Birth weight and childhood growth. *Pediatrics*. 1988;82:828–834.
  34. Gillman MW, Rifas-Shiman S, Berkey CS, Field AE, Colditz GA. Maternal



- Gestational Diabetes, Birth Weight, and Adolescent Obesity. *Pediatrics*. 2003;111:e221–e226.
35. Schellong K, Schulz S, Harder T, Plagemann A. Birth Weight and Long-Term Overweight Risk: Systematic Review and a Meta-Analysis Including 643,902 Persons from 66 Studies and 26 Countries Globally. *PLoS One*. 2012;7.
  36. Ruiz-Narváez EA, Palmer JR, Gerlovin H, Wise LA, Vimalananda VG, Rosenzweig JL, Rosenberg L. Birth weight and risk of type 2 diabetes in the black women’s health study: Does adult BMI play a mediating role? *Diabetes Care*. 2014;37:2572–2578.
  37. Myatt L. Placental adaptive responses and fetal programming. *J Physiol*. 2006;572:25–30.
  38. Santos MS, Joles JA. Early determinants of cardiovascular disease. *Best Pract Res Clin Endocrinol Metab*. 2012;26:581–597.
  39. Cook JT, Levy JC, Page RC, Shaw JA, Hattersley AT, Turner RC. Association of low birth weight with beta cell function in the adult first degree relatives of non-insulin dependent diabetic subjects. *Bmj*. 1993;306:302–306.
  40. Bulik-Sullivan B, Finucane HK, Anttila V, Gusev A, Day FR, Loh P-R, Duncan L, Perry JRB, Patterson N, Robinson EB, Daly MJ, Price AL, Neale BM. An atlas of genetic correlations across human diseases and traits. *Nat Genet*. 2015;47:1236–1241.
  41. Dunford AR, Sangster JM. Maternal and paternal periconceptional nutrition as an indicator of offspring metabolic syndrome risk in later life through epigenetic imprinting: A systematic review. *Diabetes Metab Syndr Clin Res Rev*. 2017.
  42. Hoyo C, Fortner K, Murtha AP, Schildkraut JM, Soubry A, Demark-

- Wahnefried W, Jirtle RL, Kurtzberg J, Forman MR, Overcash F, Huang Z, Murphy SK. Association of cord blood methylation fractions at imprinted insulin-like growth factor 2 (IGF2), plasma IGF2, and birth weight. *Cancer Causes Control*. 2012;23:635–645.
43. Murrell A, Ito Y, Verde G, Huddleston J, Woodfine K, Silengo MC, Spreafico F, Perotti D, De Crescenzo A, Sparago A, Cerrato F, Riccio A. Distinct methylation changes at the IGF2-H19 locus in congenital growth disorders and cancer. *PLoS One*. 2008;3:1–7.
  44. Morrison JL, Regnault TRH. Nutrition in pregnancy: Optimising maternal diet and fetal adaptations to altered nutrient supply. *Nutrients*. 2016;8:3–7.
  45. Story L, Pasupathy D, Sankaran S, Sharland G, Kyle P. Influence of birthweight on perinatal outcome in fetuses with antenatal diagnosis of congenital heart disease. *J Obstet Gynaecol Res*. 2015;41:896–903.
  46. Morrison KM, Ramsingh L, Gunn E, Streiner D, Van Lieshout R, Boyle M, Gerstein H, Schmidt L, Saigal S. Cardiometabolic Health in Adults Born Premature With Extremely Low Birth Weight. *Pediatrics*. 2016;138:e20160515–e20160515.
  47. Deen JF, Krieger E V., Slee AE, Arslan A, Arterburn D, Stout KK, Portman MA. Metabolic syndrome in adults with congenital heart disease. *J Am Heart Assoc*. 2016;5:1–9.
  48. Lapillonne A, Griffin IJ. Feeding preterm infants today for later metabolic and cardiovascular outcomes. *J Pediatr*. 2013;162:S7–S16.
  49. Fewtrell MS, Doherty C, Cole TJ, Stafford M, Hales CN, Lucas a. Effects of size at birth, gestational age and early growth in preterm infants on glucose and insulin concentrations at 9-12 years. *Diabetologia*. 2000;43:714–717.

## Figures

**Figure 1.** Inverse-variance weighted Mendelian Randomization (IVW) and association results (BETA/HR/OR) of birth weight (BW) with cardiovascular outcomes in UK Biobank using multivariable-adjusted linear and logistic regression, and multivariable-adjusted Cox proportional hazards models. **a.** Continuous outcomes: systolic and diastolic blood pressure in UK Biobank (SBP UKB, and DBP UKB; respectively), body mass index (BMI), waist-to-hip ratio (WHR), high density lipoprotein (HDL); low density lipoproteins (LDL); triglycerides (TG); body fat percentage (BF); 2-hour glucose; fasting glucose; and fasting insulin. **b.** Binary outcomes: coronary artery disease (CAD); atrial fibrillation (AF); ischemic hemorrhagic stroke (IS and HS, respectively); heart failure (HF); type 2 diabetes (T2D) and lipid medications (LIP).

**a.**

|                             | <b>Beta</b> | <b>95 % CI</b> |
|-----------------------------|-------------|----------------|
| <b>SBP UKB N=33</b>         |             |                |
| IVW                         | -0.33       | (-1.66, -1.00) |
| BETA                        | -0.83       | (-0.90, -0.75) |
| <b>DBP UKB N=33</b>         |             |                |
| IVW                         | 0.21        | (-0.45, 0.87)  |
| BETA                        | -0.26       | (-0.31, -0.22) |
| <b>BMI N=38</b>             |             |                |
| IVW                         | 0.13        | (0.08, -0.18)  |
| BETA                        | 0.04        | (0.04, -0.04)  |
| <b>WHR N=38</b>             |             |                |
| IVW                         | -0.08       | (-0.15, -0.01) |
| BETA                        | 0.01        | (-0.01, 0.01)  |
| <b>HDL N=38</b>             |             |                |
| IVW                         | -0.05       | (-0.12, -0.02) |
| <b>LDL N=38</b>             |             |                |
| IVW                         | -0.11       | (-0.18, -0.05) |
| <b>TG N=37</b>              |             |                |
| IVW                         | -0.05       | (-0.11, 0.01)  |
| <b>BF</b>                   |             |                |
| BETA                        | 0.02        | (0.01, 0.02)   |
| <b>2hr glucose N=17</b>     |             |                |
| IVW                         | -0.66       | (-1.00, -0.33) |
| <b>Fasting glucose N=38</b> |             |                |
| IVW                         | -0.14       | (-0.28, -0.01) |
| <b>Fasting insulin N=38</b> |             |                |
| IVW                         | -0.01       | (-0.06, 0.04)  |

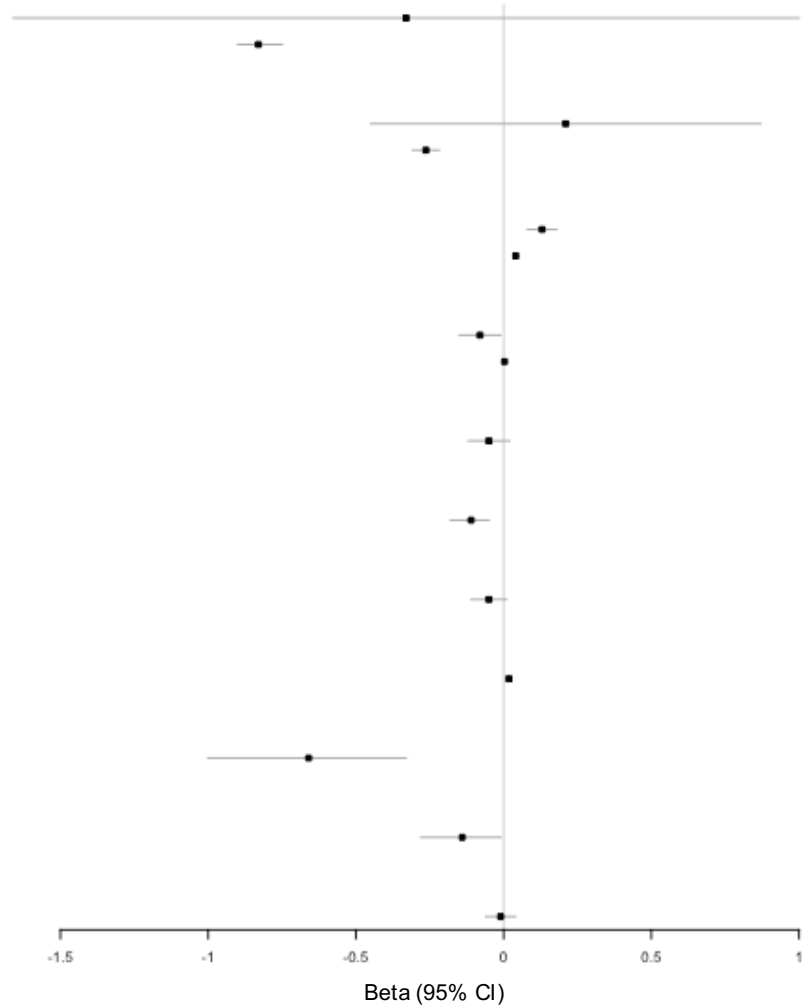

**b.**

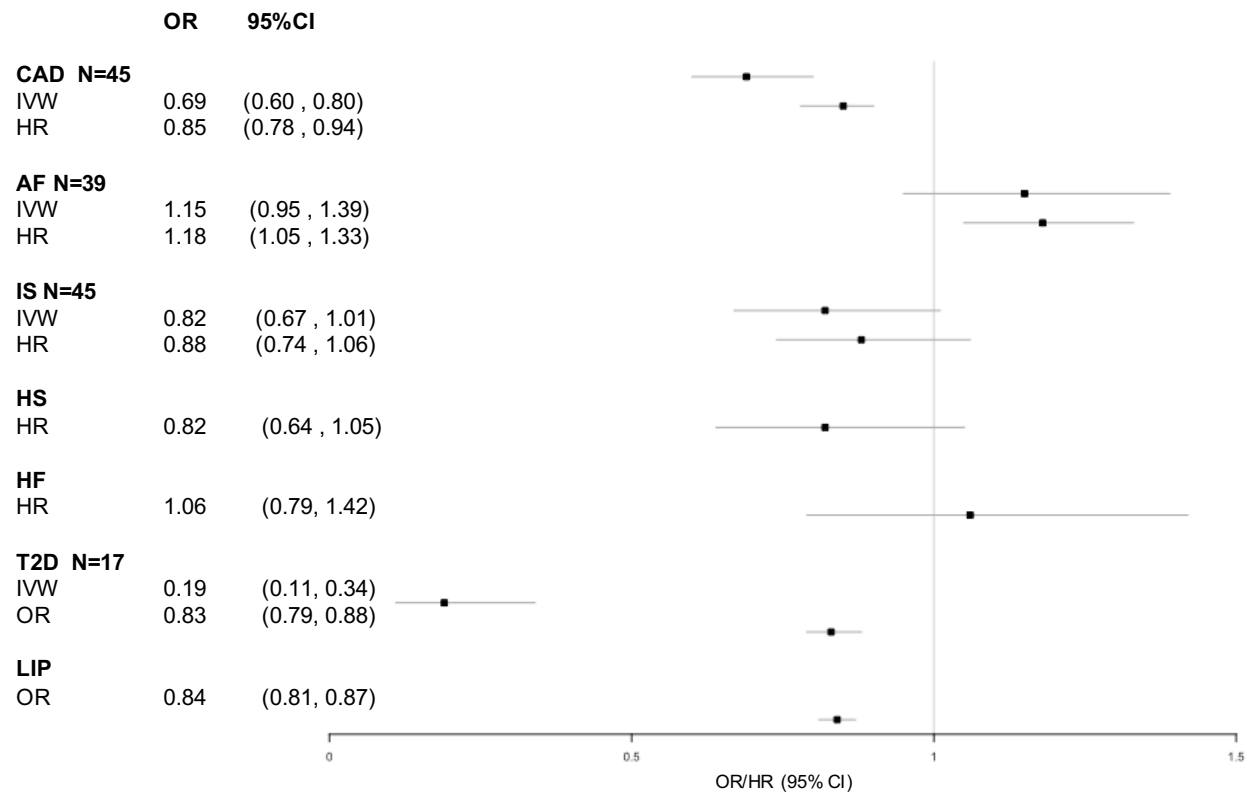

The betas from linear regression represent SD change in outcome variable per SD change in BW, except for SBP and DBP where they represent the outcome in raw unit (mmHg) per SD change in BW. Mendelian randomization analyses were based on the 46 variants included in the instrument variable 2 using data sources listed in Table 1. All effects for the IVW (beta or OR) are given in original units as provided by the consortia.

Model adjustment: age, sex, region of the UKB assessment center, ethnicity, maternal smoking and Townsend index. Abbreviations: HR, hazard ratio; OR, odds ration; CI, confidence interval; N= number of variants included in the instrument variable.

## Tables

**Table 1.** Description of data used and statistical power for Mendelian randomization analyses.

| Phenotype       | Consortium        | N samples | Variants in the IV2 | Variance explained (%) | Effect in UKB | Power for observed association (%) | Power for fixed standardized effect | Units                   | Publication                 |
|-----------------|-------------------|-----------|---------------------|------------------------|---------------|------------------------------------|-------------------------------------|-------------------------|-----------------------------|
| BW              | EGG               | 143,677   |                     |                        |               |                                    |                                     | SD (kg/m <sup>2</sup> ) | Horikoshi et al., 2016      |
| CAD             | CARDioGRAMplusC4D | 184,305   | 45                  | 0.022                  | 0.854         | 99                                 | 100                                 | log odds                | Nikpay et al., 2015         |
| AF              | AFGen             | 133,073   | 39                  | 0.020                  | 1.179         | 84                                 | 90                                  | log odds                | Christophersen et al., 2017 |
| IS              | ISGC              | 435,001   | 45                  | 0.022                  | 0.881         | 94                                 | 99                                  | log odds                | Pulit et al., 2016          |
| SBP             | UKB               | 337,229   | 33                  | 0.022                  | -0.042        | 95                                 | 100                                 | mmHg                    | Sudlow et al., 2015         |
| DBP             | UKB               | 337,235   | 33                  | 0.022                  | -0.025        | 58                                 | 100                                 | mmHg                    |                             |
| SBP             | ICBP              | 201,529   | 34                  | 0.020                  | -0.042        | 76                                 | 100                                 | mmHg                    | Ehret et al., 2016          |
| DBP             | ICBP              | 201,529   | 34                  | 0.020                  | -0.025        | 35                                 | 100                                 | mmHg                    |                             |
| BMI             | GIANT             | 339,224   | 38                  | 0.020                  | 0.041         | 92                                 | 100                                 | SD (kg/m <sup>2</sup> ) | Locke et al., 2015          |
| WHR             | GIANT             | 210,082   | 38                  | 0.020                  | 0.003         | 4                                  | 100                                 | SD                      | Shungin et al., 2015        |
| HDL             | GLGC              | 187,167   | 38                  | 0.020                  | NA            | NA                                 | 100                                 | SD (mg/dL)              | Willer CJ et al., 2013      |
| LDL             | GLGC              | 173,082   | 38                  | 0.020                  | NA            | NA                                 | 100                                 | SD (mg/dL)              |                             |
| TG              | GLGC              | 177,861   | 37                  | 0.020                  | NA            | NA                                 | 100                                 | SD (mg/dL)              |                             |
| T2D             | DIAGRAM           | 149,821   | 17                  | 0.012                  | 0.832         | 92                                 | 91                                  | log odds                | Morris et al., 2012         |
| 2hr glucose     | MAGIC             | 42,854    | 17                  | 0.010                  | NA            | NA                                 | 87                                  | mmol/L                  | Scott et al., 2013          |
| Fasting glucose | MAGIC             | 58,074    | 38                  | 0.020                  | NA            | NA                                 | 99                                  | mmol/L                  | Manning et al., 2012        |
| Fasting insulin | MAGIC             | 51,750    | 38                  | 0.020                  | NA            | NA                                 | 99                                  | log pmol/L              |                             |

Characteristics of the consortia used in our study: number of samples, number of SNP included in the IV2 for different outcomes, proportion of phenotype variance explained by the instruments (tested in UKB), statistical power for a fixed effect of 0.15 SD (continuous traits) or 20% (binary traits) per SD change in BW, beta (continuous traits), OR (T2D) or HR (cardiovascular outcomes) from observational analyses in UKB and statistical power calculated for this observed association.

Abbreviations: BW, birthweight; CAD, coronary artery disease; AF, atrial fibrillation; IS, ischemic stroke; SBP, systolic blood pressure; UKB, UK Biobank; DBP, diastolic blood

pressure; BMI, body mass index; WHR, waist-to-hip ratio; HDL, high density lipoprotein; LDL, low density lipoproteins; TG, triglycerides; T2D, type 2 diabetes; EGG, Early Growth Genetics; CAD, CARDIoGRAMplusC4D; AFGen, Atrial Fibrillation Genetics; ISGC, International Stroke Genetics Consortium; ICBP, International Consortium for Blood Pressure; GIANT, Genetic Investigation of ANthropometric Traits; GLGC, Global Lipids Genetic Consortium; DIAGRAM, DIAbetes Genetics Replication and Meta-analysis; MAGIC, Meta-Analysis of Glucose and Insulin related traits Consortium; SD, standard deviation.
